# Supplementary material for: Chromatin modifiers and recombination factors promote a telomere fold-back structure, that is lost during replicative senescence
Source: PubMed Central journal article supplement (PMC7793543; doi:10.1371/journal.pgen.1008603), 2020-12-28

Table with 18 columns of gene IDs and 18 columns of gene IDs. The table contains a large number of rows, each representing a set of gene identifiers.

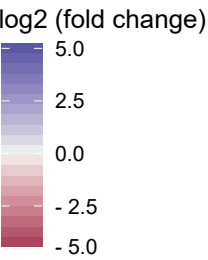

Supplement: pgen.1008603.s004.pdf [file pgen.1008603.s004.pdf]
